# Supplementary material for: Electron polarons in the subsurface layer of Mo/W-doped BiVO4 surfaces
Source: Royal Society of Chemistry journal article supplement (doi:10.1039/c8ra09009b), 2019-01-01
Supplement: c8ra09009b1.pdf [file c8ra09009b1.pdf]

Supporting Information for

# **Electron polarons in the subsurface layer of Mo/W-doped BiVO<sub>4</sub> surfaces**

Jianhang Cen, Shunning Li\*, Jiabin Zheng, Feng Pan\*

School of Advanced Materials, Peking University, Shenzhen Graduate School,

Shenzhen 518055, People's Republic of China

\*Corresponding authors: S. Li ([lisn@pkusz.edu.cn](mailto:lisn@pkusz.edu.cn)) and F. Pan

([panfeng@pkusz.edu.cn](mailto:panfeng@pkusz.edu.cn))

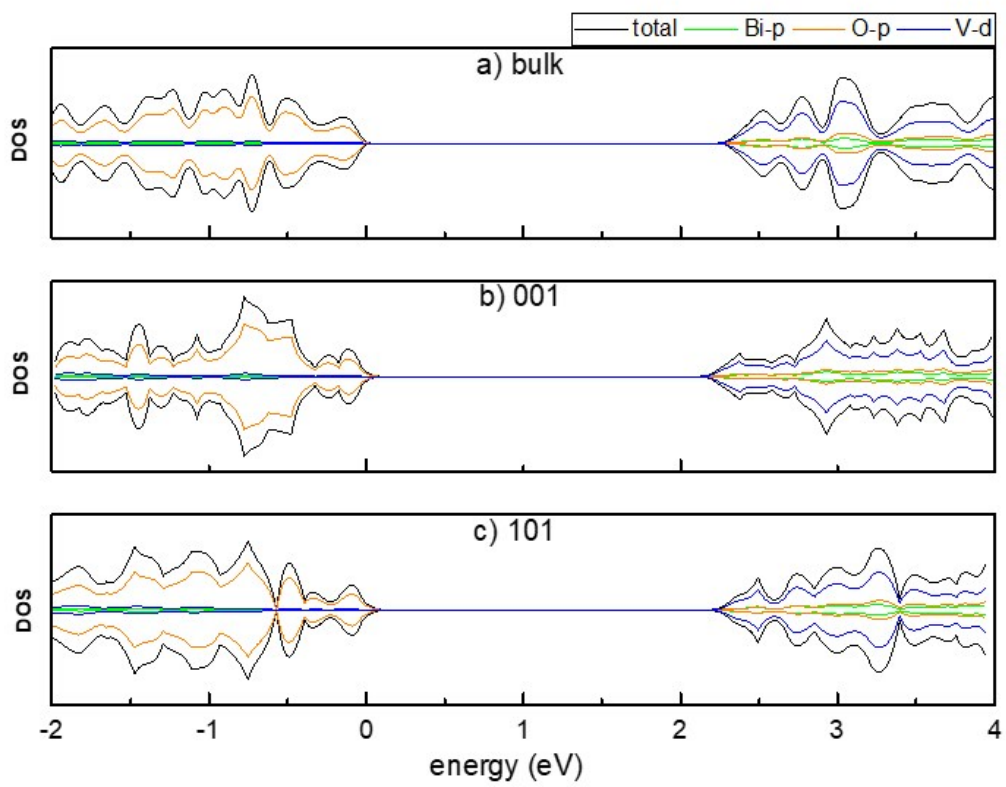

Fig. S1 DOS of (a) BiVO<sub>4</sub> bulk, (b) (001) surface, and (c) (101) surface.

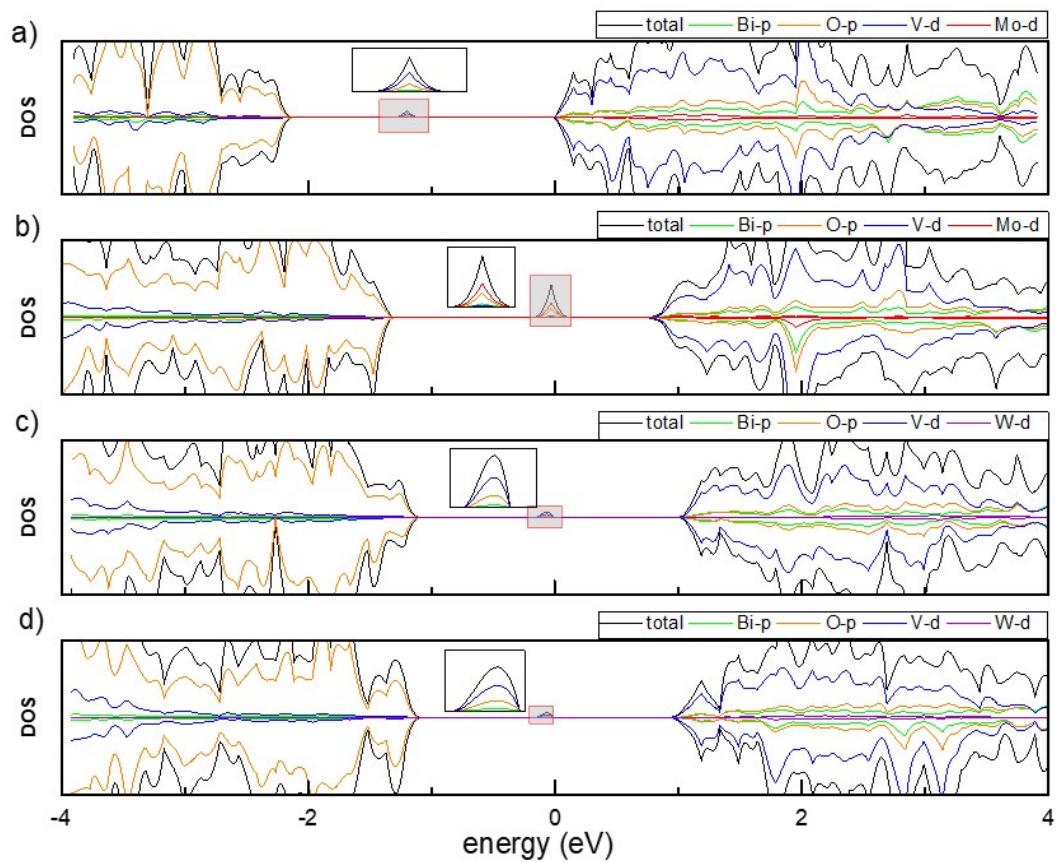

Fig S2 DOS for Mo/W-doped (001) surfaces. Mo doped in (a) the first and (b) second layers; W doped in (c) the first and (d) second layers.

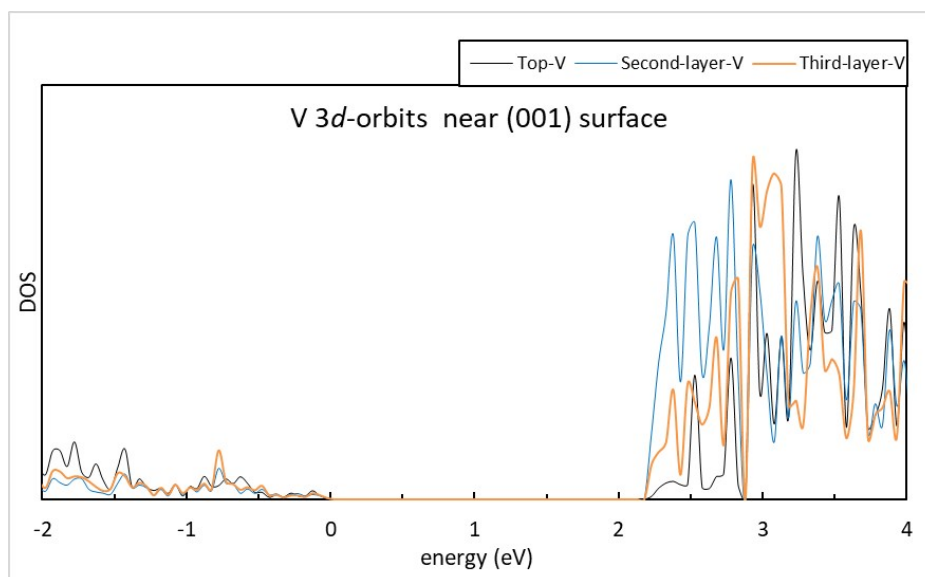

Fig. S3 Local DOS of V-3d orbitals near the (001) surface.

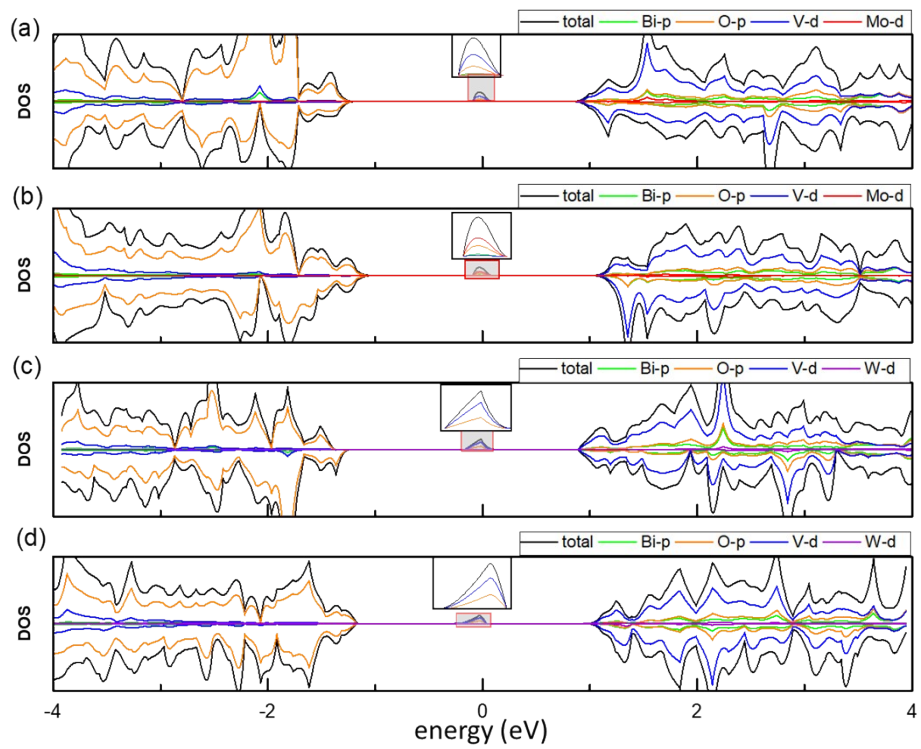

Fig S4 DOS for Mo/W-doped (101) surfaces. Mo doped in (a) the first and (b) second layers; W doped in (c) the first and (d) second layers.

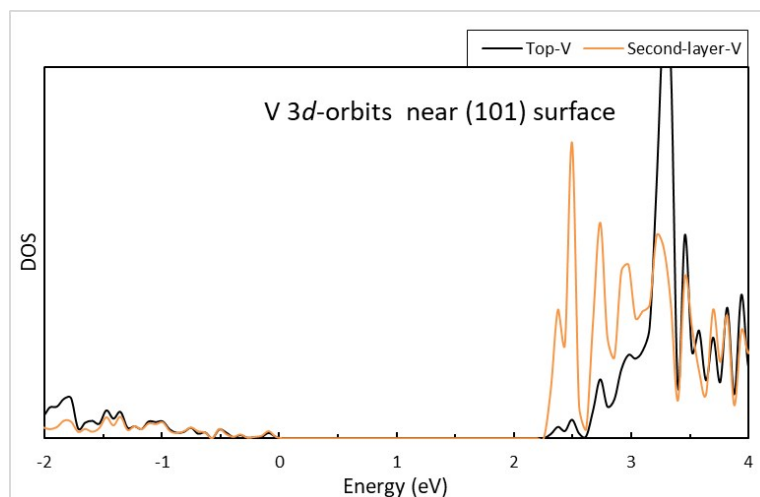

Fig. S5 Local DOS of V-3d orbitals near the (101) surface.
